# Supplementary material for: Comprehensive study of rice YABBY gene family: evolution, expression and interacting proteins analysis
Source: PeerJ. 2023 Feb 24;11:e14783. doi: 10.7717/peerj.14783 (PMC9969854; doi:10.7717/peerj.14783)
Supplement: Supplemental Information 1 — Loc numbers of all genes used in the phylogenetic tree. [file peerj-11-14783-s001.xlsx]

## Sheet: Sheet1
Table S1 Gene information of YABBY genes in rice, Arabidopsis, maize and tomato
Gene name	Locus ID	Chr
OsYABBY1	LOC_Os07g06620	Chr07
OsYABBY2	LOC_Os03g44710	Chr03
OsYABBY3	LOC_Os10g36420	Chr10
OsYABBY4	LOC_Os02g42950	Chr02
OsYABBY5	LOC_Os04g45330	Chr04
OsYABBY6	LOC_Os12g42610	Chr12
OsYABBY7	LOC_Os07g38410	Chr07
OsDL	LOC_Os03g11600	Chr03
AtYAB2	At1g08465	Chr01
AtYAB3	At4g00180	Chr04
AtFIL	At2g45190	Chr02
AtYAB5	At2g26580	Chr02
AtCRC	At1g69180	Chr01
AtINO	At1g23420	Chr01
SlYABBY5b	Solyc12g009580.1.1	Chr12
SlYABBY2a	Solyc06g073920.2.1	Chr06
SlYABBY2b	Solyc11g071810.1.1	Chr11
SlYABBY1a	Solyc01g091010.2.1	Chr01
SlYABBY1b	Solyc08g079100.2.1	Chr08
SlCRCa	Solyc01g010240.2.1	Chr01
SlCRCb	Solyc05g012050.2.1	Chr05
SlINO	Solyc05g005240.1.1	Chr05
SlYABBY5a	Solyc07g008180.2.1	Chr07
ZmYAB1	Zm00001eb075520	Chr02
ZmYAB2	Zm00001eb008680	Chr01
ZmYAB3	Zm00001eb300360	Chr07
ZmYAB4	Zm00001eb324980	Chr07
ZmYAB5	Zm00001eb134520	Chr03
ZmYAB6	Zm00001eb218500	Chr05
ZmYAB7	Zm00001eb400130	Chr09
ZmYAB9	Zm00001eb220660	Chr05
ZmYAB10	Zm00001eb043940	Chr01
ZmYAB11	Zm00001eb032110	Chr01
ZmYAB12	Zm00001d033508	Chr01
ZmYAB13	Zm00001d013663	Chr05
ZmYAB14	Zm00001eb427470	Chr10
ZmYAB15	Zm00001eb248640	Chr05
