# Supplementary material for: Comprehensive study of rice YABBY gene family: evolution, expression and interacting proteins analysis
Source: PeerJ. 2023 Feb 24;11:e14783. doi: 10.7717/peerj.14783 (PMC9969854; doi:10.7717/peerj.14783)
Supplement: Supplemental Information 2 [file peerj-11-14783-s002.xlsx]

## Sheet: Sheet1
Table S2 Primers used in this study
Purpose	Primer names	Sequences (5’→3’)
qRT-PCR	OsYABBY1-F	AACCAGTCAGCAGCAAGTGT
	OsYABBY1-R	GCCTCCCTGTGGCTAATCTC
	OsYABBY2-F	TGCAACACAATTTTCGCGGT
	OsYABBY2-R	TCTTCTGCTGGGAGTGCTTG
	OsYABBY3-F	CCACTCCCTCCTGGATGAGA
	OsYABBY3-R	TTGTTGTTCCTGCAGCTTGC
	OsYABBY4-F	GCCCATTTCCCTCACATCCA
	OsYABBY4-R	CGCAGCATACAGGCTATCCT
	OsYABBY5-F	ATCAAGGCAAGCAATCCGGA
	OsYABBY5-R	GTCTTCTTCAGGCCCTGGTC
	OsYABBY6-F	ACATTAGCCACAGGGAAGCC
	OsYABBY6-R	GAGCTTCTTGCCACCCTCAT
	OsYABBY7-F	CATCGAGCTGACTCCACAGG
	OsYABBY7-R	TGCATCGTCCTCTGCATCTC
	OsDL-F	CTGACTGCAGGAGGAACCAG
	OsDL-R	AGGCGGTGTTTCTTCTCTGG
	Actin1-F	TGTATGCCAGTGGTCGTACCA
	Actin1-R	CCAGCAAGGTCGAGACGAA
Yeast two-hybrid	OsYABBY1-BD-F	GAATTCCCGGGGATCCGTATGTCGGTCCAGTTTACATCGG
	OsYABBY1-BD-R	TGCAGGTCGACGGATCCCGTTGCTGCCGCCGCC
	OsYABBY2-BD-F	GAATTCCCGGGGATCCGTATGTCGGCACAGATCGTGC
	OsYABBY2-BD-R	TGCAGGTCGACGGATCCCATACAGCCTTTGAACCTTTTGGG
	OsYABBY3-BD-F	GAATTCCCGGGGATCCGTATGTCGTCGTCGTCCTCGTC
	OsYABBY3-BD-R	TGCAGGTCGACGGATCCCGTACGGTGCAACACCCATGTT
	OsYABBY4-BD-F	GAATTCCCGGGGATCCGTATGTCGTCCTCGTCCTCGTC
	OsYABBY4-BD-R	TGCAGGTCGACGGATCCCGAACGGAGTGACGCCCATG
	OsYABBY5-BD-F	GAATTCCCGGGGATCCGTATGATGTCGTCGGCGCC
	OsYABBY5-BD-R	TGCAGGTCGACGGATCCCGAATGGAGTGACACCCATGCT
	OsYABBY6-BD-F	GAATTCCCGGGGATCCGTATGTCTGCCCAGATCGCTC
	OsYABBY6-BD-R	TGCAGGTCGACGGATCCCTGAGTAGAAACCTTGGATCTTCTT
	OsYABBY7-BD-F	GAATTCCCGGGGATCCGTATGTCGTCGGCGGCG
	OsYABBY7-BD-R	TGCAGGTCGACGGATCCCGCAGCTATCCCTGCCTCG
	OsDL-BD-F	GAATTCCCGGGGATCCGTATGGATCTCGTGTCGCCGTCC
	OsDL-BD-R	TGCAGGTCGACGGATCCCGCCGCTGCGCTCCATCTG
	OsWUS-AD-F	CATCGATACGGGATCCATATGGATCACATGCAGCAGCA
	OsWUS-AD-R	TCGAGCTCGATGGATCCCCATGGACCCTGCAGGGTAAG
	OsWOX3A-AD-F	CATCGATACGGGATCCATATGCCTCAGACCCCTTCGA
	OsWOX3A-AD-R	TCGAGCTCGATGGATCCCATTGGTGGAGGTGGAGCAAG
Luciferase complementation imaging	OsYABBY1-Nluc-F	CGGCGCGCCACTAGTGTCGACATGTCGGTCCAGTTTACATCGG
	OsYABBY1-Nluc-R	CGCGTACGAGATCTGGTCGACGTTGCTGCCGCCGCC
	OsYABBY2-Nluc-F	CGGCGCGCCACTAGTGTCGACATGTCGGCACAGATCGTGC
	OsYABBY2-Nluc-R	CGCGTACGAGATCTGGTCGACATACAGCCTTTGAACCTTTTGGG
	OsYABBY3-Nluc-F	CGGCGCGCCACTAGTGTCGACATGTCGTCGTCGTCCTCGTC
	OsYABBY3-Nluc-R	CGCGTACGAGATCTGGTCGACGTACGGTGCAACACCCATGTT
	OsYABBY4-Nluc-F	CGGCGCGCCACTAGTGTCGACATGTCGTCCTCGTCCTCGTC
	OsYABBY4-Nluc-R	CGCGTACGAGATCTGGTCGACGAACGGAGTGACGCCCATG
	OsYABBY5-Nluc-F	CGGCGCGCCACTAGTGTCGACATGATGTCGTCGGCGCC
	OsYABBY5-Nluc-R	CGCGTACGAGATCTGGTCGACGAATGGAGTGACACCCATGCTA
	OsYABBY6-Nluc-F	CGGCGCGCCACTAGTGTCGACATGTCTGCCCAGATCGCTC
	OsYABBY6-Nluc-R	CGCGTACGAGATCTGGTCGACTGAGTAGAAACCTTGGATCTTCTT
	OsWOX3A-Cluc-F	TACGCGTCCCGGGGCGGTACCATGCCTCAGACCCCTTCG
	OsWOX3A-Cluc-R	ACGAAAGCTCTGCAGGTCGACTTAATTGGTGGAGGTGGAGC
	OsWUS-Cluc-F	TACGCGTCCCGGGGCGGTACCATGGATCACATGCAGCAGC
	OsWUS-Cluc-R	ACGAAAGCTCTGCAGGTCGACCATGGACCCTGCAGGGTAA
