# Supplementary material for: Comprehensive study of rice YABBY gene family: evolution, expression and interacting proteins analysis
Source: PeerJ. 2023 Feb 24;11:e14783. doi: 10.7717/peerj.14783 (PMC9969854; doi:10.7717/peerj.14783)
Supplement: Supplemental Information 3 [file peerj-11-14783-s003.xls]

## Sheet: Sheet1
Table S3 The expression levels of OsYABBY genes derived from microarray data
	OsYABBY1	OsYABBY2	OsYABBY3	OsYABBY4	OsYABBY5	OsYABBY6	OsYABBY7	OsDL
leaf blade	-8.804	0.08934	-7.611	-7.618	-8.027	-1.966	-7.845	3.533
root	-7.728	-6.886	-6.228	-5.933	-8.703	-9.543	-9.314	2.726
stem	-8.978	-4.871	-4.891	-5.435	-7.404	-3.746	-9.637	3.617
inflorescence	-5.91	-1.7961	0.0677	2.3149	2.708	-1.57	-8.098	3.852
anther	-8.717	-7.087	-6.485	-4.607	-7.845	-8.113	-7.541	2.765
pistil	-4.556	0.7312	-1.2128	0.47	-2.294	-0.782	-0.3685	3.789
lemma	-4.396	2.097	-1.24	1.618	-4.0716	1.059	-8.065	3.257
palea	-4.021	2.147	-1.523	-3.217	-1.808	1.1148	-7.1056	3.6687
ovary	-5.01	1.552	-4.341	-5.422	-6.073	0.6499	-8.813	3.4778
embryo	-8.475	-0.9407	-1.7219	0.5106	-1.0071	-1.7529	-8.613	4.4304
endosperm	-6.83	-1.1194	-7.883	-6.7042	-7.96	-0.3624	-7.463	6.332
