# Supplementary material for: Comprehensive study of rice YABBY gene family: evolution, expression and interacting proteins analysis
Source: PeerJ. 2023 Feb 24;11:e14783. doi: 10.7717/peerj.14783 (PMC9969854; doi:10.7717/peerj.14783)
Supplement: Supplemental Information 4 [file peerj-11-14783-s004.xlsx]

## Sheet: Sheet1
Table S3 Information about proteins in interaction networks
Predicted functional partners	Locus ID	Information
WOX3A	LOC_Os12g01120	WUSCHEL-related homeobox 3A; Transcription factor which may be involved in developmental processes. Seems to act as repressor of YAB5; Belongs to the WUS homeobox family.
qSH1	LOC_Os01g62920	Putative transcription factor qSH-1; QSH-1
RS2	LOC_Os12g38400	Transcription factor required for normal cell differentiation. May interact with other proteins to repress the knox homeobox genes (By similarity)
BIP1	LOC_Os02g02410	Key chaperone involved in folding of secretory proteins in the endoplasmic reticulum (ER) lumen (Probable). Involved in ER quality control for seed storage proteins during seed maturation .
RL9	LOC_Os09g23200	Probable transcription factor RL9; Probable transcription factor that regulates abaxial identity during leaf development
CYCD6-1	LOC_Os07g37010	Cyclin-D6-1 ; Belongs to the cyclin family. Cyclin D subfamily
GRF1	LOC_Os02g53690	Growth-regulating factor 1; Transcription activator that plays a regulatory role in gibberellin-induced stem elongation
MADS16	LOC_Os06g49840	MADS-box transcription factor 16; Probable transcription factor involved in the development of floral organs. Required for normal development of lodicules and stamens.
KTI12	Os11g0312340	Elongator-associated factor that is not a structural subunit but rather transiently contacts Elongator, presumably to promote its interaction with elongation competent pol II . Regulates both meristem activity and organ growth; acts as a positive regulator of adaxial leaf patterning.
LBD6	LOC_Os01g66590	LOB domain-containing protein 6; Negative regulator of cell proliferation in the adaxial side of leaves. Regulates the formation of a symmetric lamina and the establishment of venation
WOX12	LOC_Os05g48990	WUSCHEL-related homeobox 12; Transcription factor which may be involved in developmental processes
CRC1	LOC_Os04g40290	Plays a key role in chromosome recombination during meiosis. Required for the initiation of meiotic recombination and the recruitment of PAIR2 onto meiotic chromosomes. Essential for meiotic DNA double-strand break (DSB) formation
WUS	LOC_Os04g56780	WUSCHEL-related homeobox 1A; Transcription factor which may be involved in developmental processes
GA2OX1	LOC_Os05g06670	Catalyzes the 2-beta-hydroxylation of several biologically active gibberellins, leading to the homeostatic regulation of their endogenous level. Catabolism of gibberellins (GAs) plays a central role in plant development.
ZIP6	LOC_Os05g07210	Zinc transporter 6; Zinc transporter that may be involved in zinc uptake from the rhizosphere
LOGL10	LOC_Os10g33900	Probable cytokinin riboside 5'-monophosphate phosphoribohydrolase LOGL10; Cytokinin-activating enzyme working in the direct activation pathway. Phosphoribohydrolase that converts inactive cytokinin nucleotides to the biologically active free-base forms
SH3	LOC_Os04g57530	Trihelix-type transcription factor; OSJNBa0043A12.37 protein; Os04g0670900 protein; Putative shattering protein
