# Supplementary material for: Comprehensive study of rice YABBY gene family: evolution, expression and interacting proteins analysis
Source: PeerJ. 2023 Feb 24;11:e14783. doi: 10.7717/peerj.14783 (PMC9969854; doi:10.7717/peerj.14783)
Supplement: Supplemental Information 5 [file peerj-11-14783-s005.xlsx]

## Sheet: Sheet1
Table S5 Molecular distance prediction
	The physical closest distance (Å)	The closest distance between hydrogen bonds (Å)
YABBY3-WUS	1	2.1
YABBY5-WUS	0.9	2.4
YABBY3-WUS	3.2	2.4
DL-WUS	2.7	2.3
YABBY3-WOX3A	3.2	2.6
