# Supplementary material for: Comprehensive study of rice YABBY gene family: evolution, expression and interacting proteins analysis
Source: PeerJ. 2023 Feb 24;11:e14783. doi: 10.7717/peerj.14783 (PMC9969854; doi:10.7717/peerj.14783)
Supplement: Supplemental Information 11 [file peerj-11-14783-s011.xls]

## Sheet: Results
Block Type	96alum
Chemistry	SYBR_GREEN
Experiment File Name	D:\b512\waq\0819.eds
Experiment Run End Time	2020-08-19 22:50:08 下午 CST
Instrument Type	sds7500
Passive Reference	ROX
Well	Sample Name	Target Name	Task	Reporter	Quencher	RQ	RQ Min	RQ Max	Cт	Cт Mean	Cт SD	ΔCт	ΔCт Mean	ΔCт SE	HK Control ΔCт Mean	HK Control ΔCт SE	ΔΔCт	Automatic Ct Threshold	Ct Threshold	Automatic Baseline	Baseline Start	Baseline End	Efficiency	Tm1	Tm2	Tm3	Comments	HIGHSD	OUTLIERRG	EXPFAIL	MTP
A1	main root	y1	UNKNOWN	SYBR	None				27.9429	27.8036	0.14862							TRUE	0.179115	TRUE	3	24	1	80.3525				N	N	N	N
A2	main root	y1	UNKNOWN	SYBR	None				27.8207	27.8036	0.14862							TRUE	0.179115	TRUE	3	23	1	80.5344				N	N	N	N
A3	main root	y1	UNKNOWN	SYBR	None				27.6472	27.8036	0.14862							TRUE	0.179115	TRUE	3	23	1	80.8984				N	N	N	N
A4	main root	y2	UNKNOWN	SYBR	None	1	0.798297	1.25267	27.3178	27.2314	0.13791		-0.572166	0.117057			0	TRUE	0.264691	TRUE	3	22	1	80.1705				N	N	N	N
A5	main root	y2	UNKNOWN	SYBR	None	1	0.798297	1.25267	27.0724	27.2314	0.13791		-0.572166	0.117057			0	TRUE	0.264691	TRUE	3	22	1	80.3525				N	N	N	N
A6	main root	y2	UNKNOWN	SYBR	None	1	0.798297	1.25267	27.304	27.2314	0.13791		-0.572166	0.117057			0	TRUE	0.264691	TRUE	3	22	1	80.5344				N	N	N	N
A7	main root	y3	UNKNOWN	SYBR	None	1	0.0128509	77.8158	27.7854	28.646	3.91612		0.842471	2.2626			0	TRUE	0.0438289	TRUE	3	25	1	82.9	74.3475	67.2508		Y	N	N	Y
A8	main root	y3	UNKNOWN	SYBR	None	1	0.0128509	77.8158	32.9209	28.646	3.91612		0.842471	2.2626			0	TRUE	0.0438289	TRUE	3	30	1	73.9836				Y	N	N	N
A9	main root	y3	UNKNOWN	SYBR	None	1	0.0128509	77.8158	25.2318	28.646	3.91612		0.842471	2.2626			0	TRUE	0.0438289	TRUE	3	22	1	74.3475				Y	N	N	N
A10	main root	y4	UNKNOWN	SYBR	None	1	0.523262	1.91109	30.5368	30.5965	0.563645		2.79292	0.336543			0	TRUE	0.125181	TRUE	3	26	1	80.8984				Y	N	N	N
A11	main root	y4	UNKNOWN	SYBR	None	1	0.523262	1.91109	30.0651	30.5965	0.563645		2.79292	0.336543			0	TRUE	0.125181	TRUE	3	26	1	80.8984	74.1656			Y	N	N	Y
A12	main root	y4	UNKNOWN	SYBR	None	1	0.523262	1.91109	31.1876	30.5965	0.563645		2.79292	0.336543			0	TRUE	0.125181	TRUE	3	27	1	80.7164				Y	N	N	N
B1	main root	actin	UNKNOWN	SYBR	None	1	7.60042e-05	13157.2	33.4268	23.5734	8.53503		-4.2302	4.92845			0	TRUE	0.179591	TRUE	3	28	1	79.2607				Y	Y	N	N
B2	main root	actin	UNKNOWN	SYBR	None	1	7.60042e-05	13157.2	18.8163	23.5734	8.53503		-4.2302	4.92845			0	TRUE	0.179591	TRUE	3	13	1	82.5361				Y	N	N	N
B3	main root	actin	UNKNOWN	SYBR	None	1	7.60042e-05	13157.2	18.477	23.5734	8.53503		-4.2302	4.92845			0	TRUE	0.179591	TRUE	3	13	1	82.718				Y	N	N	N
B4	main root	y5	UNKNOWN	SYBR	None	1	0.664121	1.50575	27.5744	27.7982	0.337053		-0.00541496	0.212675			0	TRUE	0.0570775	TRUE	3	23	1	85.4475	71.982			N	N	N	Y
B5	main root	y5	UNKNOWN	SYBR	None	1	0.664121	1.50575	27.6342	27.7982	0.337053		-0.00541496	0.212675			0	TRUE	0.0570775	TRUE	3	24	1	84.3557				N	N	N	N
B6	main root	y5	UNKNOWN	SYBR	None	1	0.664121	1.50575	28.1858	27.7982	0.337053		-0.00541496	0.212675			0	TRUE	0.0570775	TRUE	3	24	1	84.5377				N	N	N	N
B7	main root	y6	UNKNOWN	SYBR	None	1	0.651344	1.53529	26.929	26.7991	0.356078		-1.00446	0.22277			0	TRUE	0.132442	TRUE	3	22	1	82.1721				N	N	N	N
B8	main root	y6	UNKNOWN	SYBR	None	1	0.651344	1.53529	27.072	26.7991	0.356078		-1.00446	0.22277			0	TRUE	0.132442	TRUE	3	23	1	82.3541				N	N	N	N
B9	main root	y6	UNKNOWN	SYBR	None	1	0.651344	1.53529	26.3963	26.7991	0.356078		-1.00446	0.22277			0	TRUE	0.132442	TRUE	3	22	1	82.1721				N	N	N	N
B10	main root	y7	UNKNOWN	SYBR	None	1	0.371866	2.68914	27.2239	26.5125	0.877814		-1.29108	0.514018			0	TRUE	0.242566	TRUE	3	22	1	80.5344	84.3557			Y	N	N	Y
B11	main root	y7	UNKNOWN	SYBR	None	1	0.371866	2.68914	26.782	26.5125	0.877814		-1.29108	0.514018			0	TRUE	0.242566	TRUE	3	21	1	84.5377	80.8984			Y	N	N	Y
B12	main root	y7	UNKNOWN	SYBR	None	1	0.371866	2.68914	25.5315	26.5125	0.877814		-1.29108	0.514018			0	TRUE	0.242566	TRUE	3	20	1	84.5377				Y	N	N	N
C1	main root	DL	UNKNOWN	SYBR	None	1	0.03189	31.3577	27.5025	25.5408	3.09738		-2.26278	1.79033			0	TRUE	0.132501	TRUE	3	23	1	83.082	86.9033			Y	N	N	Y
C2	main root	DL	UNKNOWN	SYBR	None	1	0.03189	31.3577	21.9701	25.5408	3.09738		-2.26278	1.79033			0	TRUE	0.132501	TRUE	3	17	1	87.0853	82.718			Y	N	N	Y
C3	main root	DL	UNKNOWN	SYBR	None	1	0.03189	31.3577	27.1498	25.5408	3.09738		-2.26278	1.79033			0	TRUE	0.132501	TRUE	3	23	1	86.9033	83.2639			Y	N	N	Y
C4	leaf	y1	UNKNOWN	SYBR	None				28.6934	28.9821	0.615301							TRUE	0.179115	TRUE	3	24	1	80.7164				Y	N	N	N
C5	leaf	y1	UNKNOWN	SYBR	None				29.6886	28.9821	0.615301							TRUE	0.179115	TRUE	3	25	1	80.7164				Y	N	N	N
C6	leaf	y1	UNKNOWN	SYBR	None				28.5642	28.9821	0.615301							TRUE	0.179115	TRUE	3	24	1	80.7164				Y	N	N	N
C7	leaf	y3	UNKNOWN	SYBR	None	21.5224	8.87109	52.216	25.7988	25.3968	0.507628		-3.58529	0.460536			-4.42777	TRUE	0.0438289	TRUE	3	23	1	77.9869	85.0836	74.7115		Y	N	N	Y
C8	leaf	y3	UNKNOWN	SYBR	None	21.5224	8.87109	52.216	24.8264	25.3968	0.507628		-3.58529	0.460536			-4.42777	TRUE	0.0438289	TRUE	3	21	1	74.8934				Y	N	N	N
C9	leaf	y3	UNKNOWN	SYBR	None	21.5224	8.87109	52.216	25.5652	25.3968	0.507628		-3.58529	0.460536			-4.42777	TRUE	0.0438289	TRUE	3	23	1	74.3475				Y	N	N	N
C10	leaf	y5	UNKNOWN	SYBR	None	6.08481	2.81116	13.1707	26.0086	26.3715	0.323126		-2.61063	0.40125			-2.60521	TRUE	0.0570775	TRUE	3	21	1	74.1656	85.2656			N	N	N	Y
C11	leaf	y5	UNKNOWN	SYBR	None	6.08481	2.81116	13.1707	26.6281	26.3715	0.323126		-2.61063	0.40125			-2.60521	TRUE	0.0570775	TRUE	3	23	1	84.3557	74.5295			N	N	N	Y
C12	leaf	y5	UNKNOWN	SYBR	None	6.08481	2.81116	13.1707	26.4776	26.3715	0.323126		-2.61063	0.40125			-2.60521	TRUE	0.0570775	TRUE	3	22	1	83.4459	73.6197			N	N	N	Y
D1	leaf	actin	UNKNOWN	SYBR	None	1.13957	0.274226	4.73557	23.9751	24.5634	1.12471		-4.41869	0.740173			-0.188487	TRUE	0.179591	TRUE	3	19	1	82.3541				Y	N	N	N
D2	leaf	actin	UNKNOWN	SYBR	None	1.13957	0.274226	4.73557	25.8602	24.5634	1.12471		-4.41869	0.740173			-0.188487	TRUE	0.179591	TRUE	3	20	1	82.1721				Y	N	N	N
D3	leaf	actin	UNKNOWN	SYBR	None	1.13957	0.274226	4.73557	23.8549	24.5634	1.12471		-4.41869	0.740173			-0.188487	TRUE	0.179591	TRUE	3	19	1	82.718				Y	N	N	N
D4	leaf	y2	UNKNOWN	SYBR	None	2.99334	1.16411	7.69694	27.3554	26.8282	0.586429		-2.15392	0.490745			-1.58176	TRUE	0.264691	TRUE	3	21	1	80.5344				Y	N	N	N
D5	leaf	y2	UNKNOWN	SYBR	None	2.99334	1.16411	7.69694	26.9325	26.8282	0.586429		-2.15392	0.490745			-1.58176	TRUE	0.264691	TRUE	3	21	1	80.1705				Y	N	N	N
D6	leaf	y2	UNKNOWN	SYBR	None	2.99334	1.16411	7.69694	26.1966	26.8282	0.586429		-2.15392	0.490745			-1.58176	TRUE	0.264691	TRUE	3	21	1	80.5344				Y	N	N	N
D7	leaf	y4	UNKNOWN	SYBR	None	0.892801	0.205213	3.88423	31.682	31.9386	1.17154		2.95651	0.764005			0.163589	TRUE	0.125181	TRUE	3	27	1	84.5377	90.7246			Y	N	N	Y
D8	leaf	y4	UNKNOWN	SYBR	None	0.892801	0.205213	3.88423	30.9166	31.9386	1.17154		2.95651	0.764005			0.163589	TRUE	0.125181	TRUE	3	26	1	84.5377				Y	N	N	N
D9	leaf	y4	UNKNOWN	SYBR	None	0.892801	0.205213	3.88423	33.2172	31.9386	1.17154		2.95651	0.764005			0.163589	TRUE	0.125181	TRUE	3	29	1	81.0803	84.3557	67.6148		Y	N	N	Y
D10	leaf	y6	UNKNOWN	SYBR	None	3.33449	1.50029	7.41112	26.2401	26.2402	0.371591		-2.74193	0.415			-1.73747	TRUE	0.132442	TRUE	3	22	1	82.3541				N	N	N	N
D11	leaf	y6	UNKNOWN	SYBR	None	3.33449	1.50029	7.41112	26.6117	26.2402	0.371591		-2.74193	0.415			-1.73747	TRUE	0.132442	TRUE	3	22	1	82.3541				N	N	N	N
D12	leaf	y6	UNKNOWN	SYBR	None	3.33449	1.50029	7.41112	25.8686	26.2402	0.371591		-2.74193	0.415			-1.73747	TRUE	0.132442	TRUE	3	21	1	81.9902	74.7115	67.6148		N	N	N	Y
E1	leaf	y7	UNKNOWN	SYBR	None	4.18176	1.80275	9.70021	25.3596	25.6269	0.441452		-3.35519	0.437217			-2.06411	TRUE	0.242566	TRUE	3	20	1	81.0803				N	N	N	N
E2	leaf	y7	UNKNOWN	SYBR	None	4.18176	1.80275	9.70021	26.1364	25.6269	0.441452		-3.35519	0.437217			-2.06411	TRUE	0.242566	TRUE	3	21	1	80.7164				N	N	N	N
E3	leaf	y7	UNKNOWN	SYBR	None	4.18176	1.80275	9.70021	25.3846	25.6269	0.441452		-3.35519	0.437217			-2.06411	TRUE	0.242566	TRUE	3	20	1	80.8984				N	N	N	N
E4	pistil	y1	UNKNOWN	SYBR	None				23.583	23.3633	0.322672							TRUE	0.179115	TRUE	3	19	1	81.8082				N	N	N	N
E5	pistil	y1	UNKNOWN	SYBR	None				22.9928	23.3633	0.322672							TRUE	0.179115	TRUE	3	18	1	81.6262				N	N	N	N
E6	pistil	y1	UNKNOWN	SYBR	None				23.514	23.3633	0.322672							TRUE	0.179115	TRUE	3	18	1	81.8082				N	N	N	N
E7	pistil	y2	UNKNOWN	SYBR	None	1.06504	0.269039	4.21612	24.0712	22.7002	1.19555		-0.663068	0.714948			-0.0909017	TRUE	0.264691	TRUE	3	19	1	81.0803				Y	N	N	N
E8	pistil	y2	UNKNOWN	SYBR	None	1.06504	0.269039	4.21612	22.1547	22.7002	1.19555		-0.663068	0.714948			-0.0909017	TRUE	0.264691	TRUE	3	17	1	80.8984				Y	N	N	N
E9	pistil	y2	UNKNOWN	SYBR	None	1.06504	0.269039	4.21612	21.8747	22.7002	1.19555		-0.663068	0.714948			-0.0909017	TRUE	0.264691	TRUE	3	17	1	80.8984				Y	N	N	N
E10	pistil	y4	UNKNOWN	SYBR	None	0.0297622	0.00587867	0.150678	31.9378	31.2266	1.00588		7.8633	0.735258			5.07037	TRUE	0.125181	TRUE	3	28	1	82.1721				Y	N	N	N
E11	pistil	y4	UNKNOWN	SYBR	None	0.0297622	0.00587867	0.150678	Undetermined	31.2266	1.00588		7.8633	0.735258			5.07037	TRUE	0.125181	TRUE	3	41	1	73.9836				N	N	Y	N
E12	pistil	y4	UNKNOWN	SYBR	None	0.0297622	0.00587867	0.150678	30.5153	31.2266	1.00588		7.8633	0.735258			5.07037	TRUE	0.125181	TRUE	3	26	1	81.4443				Y	N	N	N
F1	leaf	DL	UNKNOWN	SYBR	None	0.692936	0.211279	2.27264	27.8804	27.2485	0.874155		-1.73357	0.617182			0.529205	TRUE	0.132501	TRUE	3	23	1	76.1672	83.2639			Y	N	N	Y
F2	leaf	DL	UNKNOWN	SYBR	None	0.692936	0.211279	2.27264	26.2509	27.2485	0.874155		-1.73357	0.617182			0.529205	TRUE	0.132501	TRUE	3	22	1	77.259				Y	N	N	N
F3	leaf	DL	UNKNOWN	SYBR	None	0.692936	0.211279	2.27264	27.6143	27.2485	0.874155		-1.73357	0.617182			0.529205	TRUE	0.132501	TRUE	3	23	1	84.9016	76.3492			Y	N	N	Y
F4	pistil	actin	UNKNOWN	SYBR	None	0.0703508	0.0283258	0.174725	23.7368	22.9624	0.752492		-0.400912	0.472709			3.82929	TRUE	0.179591	TRUE	3	18	1	82.718				Y	N	N	N
F5	pistil	actin	UNKNOWN	SYBR	None	0.0703508	0.0283258	0.174725	22.2339	22.9624	0.752492		-0.400912	0.472709			3.82929	TRUE	0.179591	TRUE	3	17	1	82.9				Y	N	N	N
F6	pistil	actin	UNKNOWN	SYBR	None	0.0703508	0.0283258	0.174725	22.9165	22.9624	0.752492		-0.400912	0.472709			3.82929	TRUE	0.179591	TRUE	3	17	1	82.9				Y	N	N	N
F7	pistil	y3	UNKNOWN	SYBR	None	0.531947	0.0468	6.04631	24.8944	25.1164	2.16368		1.75312	1.26302			0.910646	TRUE	0.0438289	TRUE	3	22	1	74.8934	85.4475			Y	N	N	Y
F8	pistil	y3	UNKNOWN	SYBR	None	0.531947	0.0468	6.04631	27.3825	25.1164	2.16368		1.75312	1.26302			0.910646	TRUE	0.0438289	TRUE	3	24	1	85.4475				Y	N	N	N
F9	pistil	y3	UNKNOWN	SYBR	None	0.531947	0.0468	6.04631	23.0723	25.1164	2.16368		1.75312	1.26302			0.910646	TRUE	0.0438289	TRUE	3	20	1	74.8934	85.2656			Y	N	N	Y
F10	pistil	y5	UNKNOWN	SYBR	None	0.00280649	0.000888607	0.00886374	32.9657	31.8349	0.983458		8.4716	0.59758			8.47702	TRUE	0.0570775	TRUE	3	29	1	84.3557				Y	N	N	N
F11	pistil	y5	UNKNOWN	SYBR	None	0.00280649	0.000888607	0.00886374	31.1797	31.8349	0.983458		8.4716	0.59758			8.47702	TRUE	0.0570775	TRUE	3	27	1	84.9016	70.8902			Y	N	N	Y
F12	pistil	y5	UNKNOWN	SYBR	None	0.00280649	0.000888607	0.00886374	31.3592	31.8349	0.983458		8.4716	0.59758			8.47702	TRUE	0.0570775	TRUE	3	27	1	84.7197	70.8902			Y	N	N	Y
G1	pistil	y6	UNKNOWN	SYBR	None	0.768759	0.25394	2.32729	23.8235	22.7382	0.943257		-0.625066	0.575572			0.379397	TRUE	0.132442	TRUE	3	19	1	82.1721				Y	N	N	N
G2	pistil	y6	UNKNOWN	SYBR	None	0.768759	0.25394	2.32729	22.2753	22.7382	0.943257		-0.625066	0.575572			0.379397	TRUE	0.132442	TRUE	3	18	1	82.5361				Y	N	N	N
G3	pistil	y6	UNKNOWN	SYBR	None	0.768759	0.25394	2.32729	22.1159	22.7382	0.943257		-0.625066	0.575572			0.379397	TRUE	0.132442	TRUE	3	17	1	82.718				Y	N	N	N
G4	pistil	DL	UNKNOWN	SYBR	None	1.72745	0.619687	4.81547	19.9095	20.3119	0.864415		-3.05142	0.532707			-0.788644	TRUE	0.132501	TRUE	3	15	1	87.6311				Y	N	N	N
G5	pistil	DL	UNKNOWN	SYBR	None	1.72745	0.619687	4.81547	19.7219	20.3119	0.864415		-3.05142	0.532707			-0.788644	TRUE	0.132501	TRUE	3	15	1	87.4492				Y	N	N	N
G6	pistil	DL	UNKNOWN	SYBR	None	1.72745	0.619687	4.81547	21.3041	20.3119	0.864415		-3.05142	0.532707			-0.788644	TRUE	0.132501	TRUE	3	17	1	87.0853				Y	N	N	N
G7	stamen	actin	UNKNOWN	SYBR	None	7.55016	0.0584487	975.298	18.9361	17.9638	0.958795		-7.14671	2.52596			-2.91651	TRUE	0.179591	TRUE	3	14	1	81.9902				Y	N	N	N
G8	stamen	actin	UNKNOWN	SYBR	None	7.55016	0.0584487	975.298	17.9362	17.9638	0.958795		-7.14671	2.52596			-2.91651	TRUE	0.179591	TRUE	3	12	1	82.3541				Y	N	N	N
G9	stamen	actin	UNKNOWN	SYBR	None	7.55016	0.0584487	975.298	17.0191	17.9638	0.958795		-7.14671	2.52596			-2.91651	TRUE	0.179591	TRUE	3	11	1	82.718				Y	N	N	N
G10	stamen	y3	UNKNOWN	SYBR	None	2.54063	0.007838	823.525	27.8669	24.6078	2.97493		-0.502714	3.00402			-1.34518	TRUE	0.0438289	TRUE	3	25	1	74.3475	85.0836			Y	N	N	Y
G11	stamen	y3	UNKNOWN	SYBR	None	2.54063	0.007838	823.525	22.0381	24.6078	2.97493		-0.502714	3.00402			-1.34518	TRUE	0.0438289	TRUE	3	19	1	74.1656				Y	N	N	N
G12	stamen	y3	UNKNOWN	SYBR	None	2.54063	0.007838	823.525	23.9182	24.6078	2.97493		-0.502714	3.00402			-1.34518	TRUE	0.0438289	TRUE	3	21	1	73.4377				Y	N	N	N
H1	pistil	y7	UNKNOWN	SYBR	None	0.041287	0.0185753	0.0917677	27.1083	26.6704	0.64236		3.30709	0.415027			4.59817	TRUE	0.242566	TRUE	3	21	1	84.9016				Y	N	N	N
H2	pistil	y7	UNKNOWN	SYBR	None	0.041287	0.0185753	0.0917677	26.9698	26.6704	0.64236		3.30709	0.415027			4.59817	TRUE	0.242566	TRUE	3	21	1	85.0836	77.9869			Y	N	N	Y
H3	pistil	y7	UNKNOWN	SYBR	None	0.041287	0.0185753	0.0917677	25.933	26.6704	0.64236		3.30709	0.415027			4.59817	TRUE	0.242566	TRUE	3	20	1	85.4475				Y	N	N	N
H4	stamen	y1	UNKNOWN	SYBR	None				20.7763	25.1105	4.26874							TRUE	0.179115	TRUE	3	16	1	81.4443				Y	N	N	N
H5	stamen	y1	UNKNOWN	SYBR	None				29.3106	25.1105	4.26874							TRUE	0.179115	TRUE	3	24	1	80.5344				Y	N	N	N
H6	stamen	y1	UNKNOWN	SYBR	None				25.2446	25.1105	4.26874							TRUE	0.179115	TRUE	3	20	1	80.8984				Y	N	N	N
H7	stamen	y2	UNKNOWN	SYBR	None	0.0586362	0.000499994	6.8765	28.1751	28.6304	0.406967		3.5199	2.47573			4.09206	TRUE	0.264691	TRUE	3	23	1	80.1705				N	N	N	N
H8	stamen	y2	UNKNOWN	SYBR	None	0.0586362	0.000499994	6.8765	28.7571	28.6304	0.406967		3.5199	2.47573			4.09206	TRUE	0.264691	TRUE	3	23	1	80.1705				N	N	N	N
H9	stamen	y2	UNKNOWN	SYBR	None	0.0586362	0.000499994	6.8765	28.9589	28.6304	0.406967		3.5199	2.47573			4.09206	TRUE	0.264691	TRUE	3	23	1	80.1705				N	N	N	N
H10	stamen	y4	UNKNOWN	SYBR	None	0.00803286	6.21294e-05	1.03859	34.0463	34.8633	0.962495		9.75279	2.52643			6.95987	TRUE	0.125181	TRUE	3	29	1	81.4443				Y	N	N	N
H11	stamen	y4	UNKNOWN	SYBR	None	0.00803286	6.21294e-05	1.03859	35.9243	34.8633	0.962495		9.75279	2.52643			6.95987	TRUE	0.125181	TRUE	3	31	1	76.5312	80.3525			Y	N	N	Y
H12	stamen	y4	UNKNOWN	SYBR	None	0.00803286	6.21294e-05	1.03859	34.6191	34.8633	0.962495		9.75279	2.52643			6.95987	TRUE	0.125181	TRUE	3	30	1	81.0803				Y	N	N	N
Analysis Type	Singleplex
Endogenous Control	y1
RQ Min/Max Confidence Level	95.0
Reference Sample	main root
