# Supplementary material for: Comprehensive study of rice YABBY gene family: evolution, expression and interacting proteins analysis
Source: PeerJ. 2023 Feb 24;11:e14783. doi: 10.7717/peerj.14783 (PMC9969854; doi:10.7717/peerj.14783)
Supplement: Supplemental Information 12 [file peerj-11-14783-s012.xls]

## Sheet: Results
Block Type	96alum
Chemistry	SYBR_GREEN
Experiment File Name	D:\b512\waq\0820.eds
Experiment Run End Time	2020-08-20 22:36:23 下午 CST
Instrument Type	sds7500
Passive Reference	ROX
Well	Sample Name	Target Name	Task	Reporter	Quencher	RQ	RQ Min	RQ Max	Cт	Cт Mean	Cт SD	ΔCт	ΔCт Mean	ΔCт SE	HK Control ΔCт Mean	HK Control ΔCт SE	ΔΔCт	Automatic Ct Threshold	Ct Threshold	Automatic Baseline	Baseline Start	Baseline End	Efficiency	Tm1	Tm2	Tm3	Comments	HIGHSD	OUTLIERRG	EXPFAIL	MTP
A1	stamen	y5	UNKNOWN	SYBR	None				29.7198	29.6358	0.374434							TRUE	0.133643	TRUE	3	25	1	70.4616	74.9346	61.6946		N	N	N	Y
A2	stamen	y5	UNKNOWN	SYBR	None				29.2265	29.6358	0.374434							TRUE	0.133643	TRUE	3	24	1	70.6405	61.6946	83.5227		N	N	N	Y
A3	stamen	y5	UNKNOWN	SYBR	None				29.9611	29.6358	0.374434							TRUE	0.133643	TRUE	3	25	1	84.5962	70.9984			N	N	N	Y
A4	stamen	y7	UNKNOWN	SYBR	None	1	0.597676	1.67315	29.9399	29.8459	0.272746		0.210103	0.267452			0	TRUE	0.240773	TRUE	3	24	1	85.3119	77.2605			N	N	N	Y
A5	stamen	y7	UNKNOWN	SYBR	None	1	0.597676	1.67315	30.0592	29.8459	0.272746		0.210103	0.267452			0	TRUE	0.240773	TRUE	3	24	1	85.133	80.3022			N	N	N	Y
A6	stamen	y7	UNKNOWN	SYBR	None	1	0.597676	1.67315	29.5386	29.8459	0.272746		0.210103	0.267452			0	TRUE	0.240773	TRUE	3	24	1	85.4908				N	N	N	N
A7	ke	y1	UNKNOWN	SYBR	None				23.2403	23.2976	0.0668656		-6.70552	0.28393				TRUE	0.0181356	TRUE	3	21	1	81.1968				N	N	N	N
A8	ke	y1	UNKNOWN	SYBR	None				23.2815	23.2976	0.0668656		-6.70552	0.28393				TRUE	0.0181356	TRUE	3	21	1	81.1968				N	N	N	N
A9	ke	y1	UNKNOWN	SYBR	None				23.3711	23.2976	0.0668656		-6.70552	0.28393				TRUE	0.0181356	TRUE	3	21	1	81.0178				N	N	N	N
A10	ke	y2	UNKNOWN	SYBR	None				25.0535	25.0537	0.00454047		-4.94946	0.281305				TRUE	0.121392	TRUE	3	21	1	80.66				N	N	N	N
A11	ke	y2	UNKNOWN	SYBR	None				25.0583	25.0537	0.00454047		-4.94946	0.281305				TRUE	0.121392	TRUE	3	20	1	80.1232				N	N	N	N
A12	ke	y2	UNKNOWN	SYBR	None				25.0492	25.0537	0.00454047		-4.94946	0.281305				TRUE	0.121392	TRUE	3	21	1	80.1232				N	N	N	N
B1	stamen	y6	UNKNOWN	SYBR	None	1	0.658547	1.51849	27.8948	27.9338	0.0337357		-1.70199	0.217055			0	TRUE	0.18793	TRUE	3	23	1	82.807				N	N	N	N
B2	stamen	y6	UNKNOWN	SYBR	None	1	0.658547	1.51849	27.954	27.9338	0.0337357		-1.70199	0.217055			0	TRUE	0.18793	TRUE	3	23	1	82.4492				N	N	N	N
B3	stamen	y6	UNKNOWN	SYBR	None	1	0.658547	1.51849	27.9525	27.9338	0.0337357		-1.70199	0.217055			0	TRUE	0.18793	TRUE	3	23	1	82.6281				N	N	N	N
B4	stamen	DL	UNKNOWN	SYBR	None	1	0.561802	1.77999	29.2872	29.2846	0.359316		-0.351195	0.299616			0	TRUE	0.244981	TRUE	3	24	1	87.4589	77.7973			N	N	N	Y
B5	stamen	DL	UNKNOWN	SYBR	None	1	0.561802	1.77999	28.924	29.2846	0.359316		-0.351195	0.299616			0	TRUE	0.244981	TRUE	3	24	1	87.4589	78.1551			N	N	N	Y
B6	stamen	DL	UNKNOWN	SYBR	None	1	0.561802	1.77999	29.6426	29.2846	0.359316		-0.351195	0.299616			0	TRUE	0.244981	TRUE	3	24	1	87.4589	77.6184			N	N	N	Y
B7	ke	actin	UNKNOWN	SYBR	None				27.1451	27.2757	0.38429		-2.72745	0.358262				TRUE	0.162161	TRUE	3	22	1	82.807	79.2286			N	N	N	Y
B8	ke	actin	UNKNOWN	SYBR	None				27.7083	27.2757	0.38429		-2.72745	0.358262				TRUE	0.162161	TRUE	3	23	1	82.807				N	N	N	N
B9	ke	actin	UNKNOWN	SYBR	None				26.9737	27.2757	0.38429		-2.72745	0.358262				TRUE	0.162161	TRUE	3	22	1	82.807				N	N	N	N
B10	ke	y3	UNKNOWN	SYBR	None				27.8774	28.3778	0.44315		-1.62538	0.380245				TRUE	0.100342	TRUE	3	24	1	85.6697	74.5768			N	N	N	Y
B11	ke	y3	UNKNOWN	SYBR	None				28.7209	28.3778	0.44315		-1.62538	0.380245				TRUE	0.100342	TRUE	3	25	1	85.4908				N	N	N	N
B12	ke	y3	UNKNOWN	SYBR	None				28.535	28.3778	0.44315		-1.62538	0.380245				TRUE	0.100342	TRUE	3	24	1	85.4908				N	N	N	N
C1	ke	y4	UNKNOWN	SYBR	None				31.9287	31.5874	0.482699		1.5842	0.442295				TRUE	0.256309	TRUE	3	27	1	81.7335				N	N	N	N
C2	ke	y4	UNKNOWN	SYBR	None				Undetermined	31.5874	0.482699		1.5842	0.442295				TRUE	0.256309	TRUE	3	39	1	71.3562				N	N	Y	N
C3	ke	y4	UNKNOWN	SYBR	None				31.246	31.5874	0.482699		1.5842	0.442295				TRUE	0.256309	TRUE	3	26	1	82.0914				N	N	N	N
C4	ke	y6	UNKNOWN	SYBR	None	18.1506	5.73031	57.4916	25.1771	24.1192	0.916156		-5.88394	0.599088			-4.18195	TRUE	0.18793	TRUE	3	20	1	83.1649				Y	Y	N	N
C5	ke	y6	UNKNOWN	SYBR	None	18.1506	5.73031	57.4916	23.5857	24.1192	0.916156		-5.88394	0.599088			-4.18195	TRUE	0.18793	TRUE	3	18	1	83.5227				Y	N	N	N
C6	ke	y6	UNKNOWN	SYBR	None	18.1506	5.73031	57.4916	23.5949	24.1192	0.916156		-5.88394	0.599088			-4.18195	TRUE	0.18793	TRUE	3	18	1	83.3438				Y	N	N	N
C7	ke	DL	UNKNOWN	SYBR	None	3.19902	0.00890119	1149.7	24.6376	27.9743	5.27356		-2.02882	3.05766			-1.67763	TRUE	0.244981	TRUE	3	19	1	88.1746				Y	N	N	N
C8	ke	DL	UNKNOWN	SYBR	None	3.19902	0.00890119	1149.7	25.2313	27.9743	5.27356		-2.02882	3.05766			-1.67763	TRUE	0.244981	TRUE	3	20	1	88.5324				Y	N	N	N
C9	ke	DL	UNKNOWN	SYBR	None	3.19902	0.00890119	1149.7	34.0541	27.9743	5.27356		-2.02882	3.05766			-1.67763	TRUE	0.244981	TRUE	3	29	1	79.0497				Y	N	N	N
C10	flower	actin	UNKNOWN	SYBR	None				22.004	26.2923	8.52896		1.86673	5.15261				TRUE	0.162161	TRUE	3	17	1	82.9859				Y	N	N	N
C11	flower	actin	UNKNOWN	SYBR	None				20.7584	26.2923	8.52896		1.86673	5.15261				TRUE	0.162161	TRUE	3	15	1	82.807				Y	N	N	N
C12	flower	actin	UNKNOWN	SYBR	None				36.1144	26.2923	8.52896		1.86673	5.15261				TRUE	0.162161	TRUE	3	31	1	78.3341				Y	N	N	N
D1	ke	y5	UNKNOWN	SYBR	None				30.2844	30.0032	0.397808							TRUE	0.133643	TRUE	3	25	1	85.3119				N	N	N	N
D2	ke	y5	UNKNOWN	SYBR	None				Undetermined	30.0032	0.397808							TRUE	0.133643	TRUE	3	39	1	62.2313				N	N	Y	N
D3	ke	y5	UNKNOWN	SYBR	None				29.7219	30.0032	0.397808							TRUE	0.133643	TRUE	3	25	1	85.8486				N	N	N	N
D4	ke	y7	UNKNOWN	SYBR	None	3.94751	1.38487	11.2522	27.9824	28.2323	0.807078		-1.77084	0.544289			-1.98094	TRUE	0.240773	TRUE	3	23	1	86.7432				Y	N	N	N
D5	ke	y7	UNKNOWN	SYBR	None	3.94751	1.38487	11.2522	29.1348	28.2323	0.807078		-1.77084	0.544289			-1.98094	TRUE	0.240773	TRUE	3	24	1	86.5643				Y	N	N	N
D6	ke	y7	UNKNOWN	SYBR	None	3.94751	1.38487	11.2522	27.5797	28.2323	0.807078		-1.77084	0.544289			-1.98094	TRUE	0.240773	TRUE	3	22	1	86.5643				Y	N	N	N
D7	flower	y1	UNKNOWN	SYBR	None				19.4128	19.1538	0.294427		-5.27169	1.52663				TRUE	0.0181356	TRUE	3	17	1	82.0914				N	N	N	N
D8	flower	y1	UNKNOWN	SYBR	None				19.2152	19.1538	0.294427		-5.27169	1.52663				TRUE	0.0181356	TRUE	3	17	1	82.0914				N	N	N	N
D9	flower	y1	UNKNOWN	SYBR	None				18.8336	19.1538	0.294427		-5.27169	1.52663				TRUE	0.0181356	TRUE	3	17	1	82.4492				N	N	N	N
D10	flower	y2	UNKNOWN	SYBR	None				37.0229	25.7984	9.72163		1.37286	5.81421				TRUE	0.121392	TRUE	3	32	1	78.513				Y	Y	N	N
D11	flower	y2	UNKNOWN	SYBR	None				20.0495	25.7984	9.72163		1.37286	5.81421				TRUE	0.121392	TRUE	3	15	1	81.0178				Y	N	N	N
D12	flower	y2	UNKNOWN	SYBR	None				20.3228	25.7984	9.72163		1.37286	5.81421				TRUE	0.121392	TRUE	3	16	1	80.8389				Y	N	N	N
E1	flower	y3	UNKNOWN	SYBR	None				19.2768	19.8639	0.597655		-4.56166	1.55588				TRUE	0.100342	TRUE	3	15	1	86.0276				Y	N	N	N
E2	flower	y3	UNKNOWN	SYBR	None				19.8432	19.8639	0.597655		-4.56166	1.55588				TRUE	0.100342	TRUE	3	16	1	86.2065				Y	N	N	N
E3	flower	y3	UNKNOWN	SYBR	None				20.4716	19.8639	0.597655		-4.56166	1.55588				TRUE	0.100342	TRUE	3	16	1	86.0276				Y	N	N	N
E4	flower	y5	UNKNOWN	SYBR	None				22.7736	24.4255	2.62776							TRUE	0.133643	TRUE	3	18	1	86.3854				Y	N	N	N
E5	flower	y5	UNKNOWN	SYBR	None				27.4557	24.4255	2.62776							TRUE	0.133643	TRUE	3	22	1	86.2065	62.0524			Y	N	N	Y
E6	flower	y5	UNKNOWN	SYBR	None				23.0473	24.4255	2.62776							TRUE	0.133643	TRUE	3	18	1	86.0276				Y	N	N	N
E7	flower	y7	UNKNOWN	SYBR	None	0.0993436	0.0053153	1.85674	27.74	27.9671	0.198085		3.54153	1.52144			3.33143	TRUE	0.240773	TRUE	3	22	1	86.2065				N	N	N	N
E8	flower	y7	UNKNOWN	SYBR	None	0.0993436	0.0053153	1.85674	28.1041	27.9671	0.198085		3.54153	1.52144			3.33143	TRUE	0.240773	TRUE	3	23	1	86.0276				N	N	N	N
E9	flower	y7	UNKNOWN	SYBR	None	0.0993436	0.0053153	1.85674	28.0571	27.9671	0.198085		3.54153	1.52144			3.33143	TRUE	0.240773	TRUE	3	22	1	86.0276				N	N	N	N
E10	stem	y1	UNKNOWN	SYBR	None				23.5057	24.087	1.69168		-5.25937	1.01693				TRUE	0.0181356	TRUE	3	22	1	81.5546				Y	N	N	N
E11	stem	y1	UNKNOWN	SYBR	None				25.9926	24.087	1.69168		-5.25937	1.01693				TRUE	0.0181356	TRUE	3	24	1	65.8097				Y	N	N	N
E12	stem	y1	UNKNOWN	SYBR	None				22.7625	24.087	1.69168		-5.25937	1.01693				TRUE	0.0181356	TRUE	3	21	1	81.1968				Y	N	N	N
F1	flower	y4	UNKNOWN	SYBR	None				19.657	20.6977	0.965234		-3.72787	1.61625				TRUE	0.256309	TRUE	3	13	1	82.0914				Y	N	N	N
F2	flower	y4	UNKNOWN	SYBR	None				21.5636	20.6977	0.965234		-3.72787	1.61625				TRUE	0.256309	TRUE	3	16	1	82.2703				Y	N	N	N
F3	flower	y4	UNKNOWN	SYBR	None				20.8724	20.6977	0.965234		-3.72787	1.61625				TRUE	0.256309	TRUE	3	15	1	82.4492				Y	N	N	N
F4	flower	y6	UNKNOWN	SYBR	None	0.774798	0.0384152	15.6269	22.3609	23.0917	0.636524		-1.33389	1.56101			0.368108	TRUE	0.18793	TRUE	3	17	1	83.5227				Y	N	N	N
F5	flower	y6	UNKNOWN	SYBR	None	0.774798	0.0384152	15.6269	23.3891	23.0917	0.636524		-1.33389	1.56101			0.368108	TRUE	0.18793	TRUE	3	18	1	83.3438				Y	N	N	N
F6	flower	y6	UNKNOWN	SYBR	None	0.774798	0.0384152	15.6269	23.525	23.0917	0.636524		-1.33389	1.56101			0.368108	TRUE	0.18793	TRUE	3	18	1	83.3438				Y	N	N	N
F7	flower	DL	UNKNOWN	SYBR	None	2.80393	0.15068	52.1768	22.4775	22.5869	0.135993		-1.83864	1.51917			-1.48745	TRUE	0.244981	TRUE	3	17	1	88.1746				N	N	N	N
F8	flower	DL	UNKNOWN	SYBR	None	2.80393	0.15068	52.1768	22.7392	22.5869	0.135993		-1.83864	1.51917			-1.48745	TRUE	0.244981	TRUE	3	17	1	88.1746				N	N	N	N
F9	flower	DL	UNKNOWN	SYBR	None	2.80393	0.15068	52.1768	22.544	22.5869	0.135993		-1.83864	1.51917			-1.48745	TRUE	0.244981	TRUE	3	17	1	88.1746				N	N	N	N
F10	stem	actin	UNKNOWN	SYBR	None				20.9095	20.7372	0.205838		-8.60913	0.307152				TRUE	0.162161	TRUE	3	16	1	82.807				N	N	N	N
F11	stem	actin	UNKNOWN	SYBR	None				20.7928	20.7372	0.205838		-8.60913	0.307152				TRUE	0.162161	TRUE	3	16	1	82.6281				N	N	N	N
F12	stem	actin	UNKNOWN	SYBR	None				20.5093	20.7372	0.205838		-8.60913	0.307152				TRUE	0.162161	TRUE	3	15	1	82.4492				N	N	N	N
G1	stem	y2	UNKNOWN	SYBR	None				23.0905	23.0425	0.0786498		-6.30386	0.286847				TRUE	0.121392	TRUE	3	19	1	80.66				N	N	N	N
G2	stem	y2	UNKNOWN	SYBR	None				22.9517	23.0425	0.0786498		-6.30386	0.286847				TRUE	0.121392	TRUE	3	19	1	80.66				N	N	N	N
G3	stem	y2	UNKNOWN	SYBR	None				23.0852	23.0425	0.0786498		-6.30386	0.286847				TRUE	0.121392	TRUE	3	18	1	81.0178				N	N	N	N
G4	stem	y4	UNKNOWN	SYBR	None				29.1667	29.329	0.156452		-0.0173111	0.297285				TRUE	0.256309	TRUE	3	24	1	84.7751	91.2162	81.7335		N	N	N	Y
G5	stem	y4	UNKNOWN	SYBR	None				29.3415	29.329	0.156452		-0.0173111	0.297285				TRUE	0.256309	TRUE	3	24	1	85.133	91.3951			N	N	N	Y
G6	stem	y4	UNKNOWN	SYBR	None				29.4788	29.329	0.156452		-0.0173111	0.297285				TRUE	0.256309	TRUE	3	24	1	84.9541	91.5741			N	N	N	Y
G7	stem	y6	UNKNOWN	SYBR	None	3.33505	1.48182	7.50605	25.555	25.9066	0.540735		-3.4397	0.421526			-1.73771	TRUE	0.18793	TRUE	3	20	1	82.9859				Y	N	N	N
G8	stem	y6	UNKNOWN	SYBR	None	3.33505	1.48182	7.50605	26.5293	25.9066	0.540735		-3.4397	0.421526			-1.73771	TRUE	0.18793	TRUE	3	21	1	82.9859				Y	N	N	N
G9	stem	y6	UNKNOWN	SYBR	None	3.33505	1.48182	7.50605	25.6356	25.9066	0.540735		-3.4397	0.421526			-1.73771	TRUE	0.18793	TRUE	3	20	1	82.9859				Y	N	N	N
G10	stem	DL	UNKNOWN	SYBR	None	4.83934	2.74146	8.54261	26.5869	26.7203	0.144694		-2.62601	0.295293			-2.27481	TRUE	0.244981	TRUE	3	21	1	87.4589				N	N	N	N
G11	stem	DL	UNKNOWN	SYBR	None	4.83934	2.74146	8.54261	26.8741	26.7203	0.144694		-2.62601	0.295293			-2.27481	TRUE	0.244981	TRUE	3	21	1	87.4589				N	N	N	N
G12	stem	DL	UNKNOWN	SYBR	None	4.83934	2.74146	8.54261	26.6999	26.7203	0.144694		-2.62601	0.295293			-2.27481	TRUE	0.244981	TRUE	3	22	1	87.28				N	N	N	N
H1	stem	y3	UNKNOWN	SYBR	None				24.9539	25.9099	0.981348		-3.43643	0.63343				TRUE	0.100342	TRUE	3	22	1	74.3978				Y	N	N	N
H2	stem	y3	UNKNOWN	SYBR	None				25.861	25.9099	0.981348		-3.43643	0.63343				TRUE	0.100342	TRUE	3	21	1	74.5768				Y	N	N	N
H3	stem	y3	UNKNOWN	SYBR	None				26.9148	25.9099	0.981348		-3.43643	0.63343				TRUE	0.100342	TRUE	3	23	1	85.4908	74.5768			Y	N	N	Y
H4	stem	y5	UNKNOWN	SYBR	None				29.0166	29.3463	0.490569							TRUE	0.133643	TRUE	3	24	1	85.3119				N	N	N	N
H5	stem	y5	UNKNOWN	SYBR	None				29.9101	29.3463	0.490569							TRUE	0.133643	TRUE	3	25	1	85.3119				N	N	N	N
H6	stem	y5	UNKNOWN	SYBR	None				29.1123	29.3463	0.490569							TRUE	0.133643	TRUE	3	24	1	85.4908				N	N	N	N
H7	stem	y7	UNKNOWN	SYBR	None	13.1462	7.07376	24.4317	25.9772	25.8398	0.265432		-3.50648	0.322031			-3.71658	TRUE	0.240773	TRUE	3	21	1	85.4908				N	N	N	N
H8	stem	y7	UNKNOWN	SYBR	None	13.1462	7.07376	24.4317	26.0084	25.8398	0.265432		-3.50648	0.322031			-3.71658	TRUE	0.240773	TRUE	3	20	1	85.3119				N	N	N	N
H9	stem	y7	UNKNOWN	SYBR	None	13.1462	7.07376	24.4317	25.5339	25.8398	0.265432		-3.50648	0.322031			-3.71658	TRUE	0.240773	TRUE	3	20	1	85.3119				N	N	N	N
H10	pei	y1	UNKNOWN	SYBR	None				24.9049	25.0924	0.287603							TRUE	0.0181356	TRUE	3	23	1	81.1968				N	N	N	N
H11	pei	y1	UNKNOWN	SYBR	None				24.9487	25.0924	0.287603							TRUE	0.0181356	TRUE	3	23	1	81.1968				N	N	N	N
H12	pei	y1	UNKNOWN	SYBR	None				25.4235	25.0924	0.287603							TRUE	0.0181356	TRUE	3	23	1	81.0178				N	N	N	N
Analysis Type	Singleplex
Endogenous Control	y5
RQ Min/Max Confidence Level	95.0
Reference Sample	stamen

## Sheet: BioGroup Analysis Result
Block Type	96alum
Chemistry	SYBR_GREEN
Experiment File Name	D:\b512\waq\0820.eds
Experiment Run End Time	2020-08-20 22:36:23 下午 CST
Instrument Type	sds7500
Passive Reference	ROX
Biogroup Name	Target Name	Task	RQ	RQ Min	RQ Max	Cт Mean	ΔCт Mean	ΔCт SE	ΔΔCт
Analysis Type	Singleplex
Endogenous Control	y5
RQ Min/Max Confidence Level	95.0
Reference Biogroup Name
