# Supplementary material for: Comprehensive study of rice YABBY gene family: evolution, expression and interacting proteins analysis
Source: PeerJ. 2023 Feb 24;11:e14783. doi: 10.7717/peerj.14783 (PMC9969854; doi:10.7717/peerj.14783)
Supplement: Supplemental Information 13 [file peerj-11-14783-s013.xls]

## Sheet: Results
Block Type	96alum
Chemistry	SYBR_GREEN
Experiment File Name	D:\b512\waq\0820-2.eds
Experiment Run End Time	2020-08-21 00:43:42 上午 CST
Instrument Type	sds7500
Passive Reference	ROX
Well	Sample Name	Target Name	Task	Reporter	Quencher	RQ	RQ Min	RQ Max	Cт	Cт Mean	Cт SD	ΔCт	ΔCт Mean	ΔCт SE	HK Control ΔCт Mean	HK Control ΔCт SE	ΔΔCт	Automatic Ct Threshold	Ct Threshold	Automatic Baseline	Baseline Start	Baseline End	Efficiency	Tm1	Tm2	Tm3	Comments	HIGHSD	OUTLIERRG	MTP
A1	pei	actin	UNKNOWN	SYBR	None				23.3313	23.4405	0.0948683							TRUE	0.164752	TRUE	3	18	1	82.1531				N	N	N
A2	pei	actin	UNKNOWN	SYBR	None				23.5028	23.4405	0.0948683							TRUE	0.164752	TRUE	3	19	1	82.1531				N	N	N
A3	pei	actin	UNKNOWN	SYBR	None				23.4874	23.4405	0.0948683							TRUE	0.164752	TRUE	3	18	1	82.3457				N	N	N
A4	pei	y3	UNKNOWN	SYBR	None	1	0.667436	1.49827	26.0658	26.2006	0.3513		2.76011	0.210089			0	TRUE	0.0942025	TRUE	3	22	1	85.0417				N	N	N
A5	pei	y3	UNKNOWN	SYBR	None	1	0.667436	1.49827	26.5994	26.2006	0.3513		2.76011	0.210089			0	TRUE	0.0942025	TRUE	3	21	1	85.4269				N	N	N
A6	pei	y3	UNKNOWN	SYBR	None	1	0.667436	1.49827	25.9367	26.2006	0.3513		2.76011	0.210089			0	TRUE	0.0942025	TRUE	3	22	1	74.2577				N	N	N
A7	pei	y5	UNKNOWN	SYBR	None	1	0.525426	1.90322	31.8122	32.3988	0.571374		8.95826	0.334399			0	TRUE	0.109436	TRUE	3	27	1	84.2714	61.548			Y	N	Y
A8	pei	y5	UNKNOWN	SYBR	None	1	0.525426	1.90322	32.9536	32.3988	0.571374		8.95826	0.334399			0	TRUE	0.109436	TRUE	3	29	1	61.548	66.5549	70.0211		Y	N	Y
A9	pei	y5	UNKNOWN	SYBR	None	1	0.525426	1.90322	32.4305	32.3988	0.571374		8.95826	0.334399			0	TRUE	0.109436	TRUE	3	28	1	84.0789	67.5177	61.548		Y	N	Y
A10	pei	y7	UNKNOWN	SYBR	None	1	0.784192	1.2752	31.288	31.1546	0.197156		7.71405	0.12632			0	TRUE	0.1639	TRUE	3	26	1	85.0417				N	N	N
A11	pei	y7	UNKNOWN	SYBR	None	1	0.784192	1.2752	31.2476	31.1546	0.197156		7.71405	0.12632			0	TRUE	0.1639	TRUE	3	27	1	85.2343				N	N	N
A12	pei	y7	UNKNOWN	SYBR	None	1	0.784192	1.2752	30.9281	31.1546	0.197156		7.71405	0.12632			0	TRUE	0.1639	TRUE	3	27	1	84.6566				N	N	N
B1	pei	y2	UNKNOWN	SYBR	None	1	0.653468	1.5303	26.9373	27.1313	0.37098		3.69077	0.221078			0	TRUE	0.261761	TRUE	3	22	1	80.6126				N	N	N
B2	pei	y2	UNKNOWN	SYBR	None	1	0.653468	1.5303	26.8975	27.1313	0.37098		3.69077	0.221078			0	TRUE	0.261761	TRUE	3	22	1	80.8051				N	N	N
B3	pei	y2	UNKNOWN	SYBR	None	1	0.653468	1.5303	27.559	27.1313	0.37098		3.69077	0.221078			0	TRUE	0.261761	TRUE	3	22	1	80.6126				N	N	N
B4	pei	y4	UNKNOWN	SYBR	None	1	0.707248	1.41393	27.6245	27.9258	0.296954		4.4853	0.179983			0	TRUE	0.221293	TRUE	3	22	1	81.5754				N	N	N
B5	pei	y4	UNKNOWN	SYBR	None	1	0.707248	1.41393	28.2182	27.9258	0.296954		4.4853	0.179983			0	TRUE	0.221293	TRUE	3	23	1	81.5754				N	N	N
B6	pei	y4	UNKNOWN	SYBR	None	1	0.707248	1.41393	27.9348	27.9258	0.296954		4.4853	0.179983			0	TRUE	0.221293	TRUE	3	23	1	81.768				N	N	N
B7	pei	y6	UNKNOWN	SYBR	None	1	0.881259	1.13474	28.1566	28.218	0.0627883		4.77752	0.0656819			0	TRUE	0.174187	TRUE	3	23	1	82.5383				N	N	N
B8	pei	y6	UNKNOWN	SYBR	None	1	0.881259	1.13474	28.2153	28.218	0.0627883		4.77752	0.0656819			0	TRUE	0.174187	TRUE	3	23	1	82.7309				N	N	N
B9	pei	y6	UNKNOWN	SYBR	None	1	0.881259	1.13474	28.2821	28.218	0.0627883		4.77752	0.0656819			0	TRUE	0.174187	TRUE	3	23	1	82.5383				N	N	N
B10	pei	DL	UNKNOWN	SYBR	None	1	0.627344	1.59402	30.9365	31.3171	0.408773		7.87656	0.242278			0	TRUE	0.225598	TRUE	3	26	1	77.9166	87.16			N	N	Y
B11	pei	DL	UNKNOWN	SYBR	None	1	0.627344	1.59402	31.2656	31.3171	0.408773		7.87656	0.242278			0	TRUE	0.225598	TRUE	3	26	1	87.16	77.5314			N	N	Y
B12	pei	DL	UNKNOWN	SYBR	None	1	0.627344	1.59402	31.7491	31.3171	0.408773		7.87656	0.242278			0	TRUE	0.225598	TRUE	3	27	1	77.5314	86.9674			N	N	Y
C1	ce root	y1	UNKNOWN	SYBR	None				29.9001	30.0812	0.207955		11.1207	0.128812				TRUE	0.205042	TRUE	3	25	1	81.3829				N	N	N
C2	ce root	y1	UNKNOWN	SYBR	None				30.3083	30.0812	0.207955		11.1207	0.128812				TRUE	0.205042	TRUE	3	25	1	81.1903				N	N	N
C3	ce root	y1	UNKNOWN	SYBR	None				30.0353	30.0812	0.207955		11.1207	0.128812				TRUE	0.205042	TRUE	3	25	1	81.3829				N	N	N
C4	ce root	y2	UNKNOWN	SYBR	None	0.0130356	0.0104901	0.0161988	28.858	28.9127	0.178046		9.95217	0.11289			6.2614	TRUE	0.261761	TRUE	3	23	1	80.9977				N	N	N
C5	ce root	y2	UNKNOWN	SYBR	None	0.0130356	0.0104901	0.0161988	28.7684	28.9127	0.178046		9.95217	0.11289			6.2614	TRUE	0.261761	TRUE	3	23	1	80.8051				N	N	N
C6	ce root	y2	UNKNOWN	SYBR	None	0.0130356	0.0104901	0.0161988	29.1117	28.9127	0.178046		9.95217	0.11289			6.2614	TRUE	0.261761	TRUE	3	24	1	80.6126				N	N	N
C7	ce root	y4	UNKNOWN	SYBR	None	0.00127358	0.000991589	0.00163577	33.0851	33.0627	0.210255		14.1022	0.13005			9.61689	TRUE	0.221293	TRUE	3	28	1	81.768				N	N	N
C8	ce root	y4	UNKNOWN	SYBR	None	0.00127358	0.000991589	0.00163577	32.8422	33.0627	0.210255		14.1022	0.13005			9.61689	TRUE	0.221293	TRUE	3	27	1	81.5754				N	N	N
C9	ce root	y4	UNKNOWN	SYBR	None	0.00127358	0.000991589	0.00163577	33.2609	33.0627	0.210255		14.1022	0.13005			9.61689	TRUE	0.221293	TRUE	3	28	1	81.768				N	N	N
C10	ce root	y6	UNKNOWN	SYBR	None	0.0241359	0.0196606	0.0296298	28.9909	29.1107	0.16594		10.1502	0.106565			5.37268	TRUE	0.174187	TRUE	3	24	1	82.7309				N	N	N
C11	ce root	y6	UNKNOWN	SYBR	None	0.0241359	0.0196606	0.0296298	29.3001	29.1107	0.16594		10.1502	0.106565			5.37268	TRUE	0.174187	TRUE	3	24	1	82.5383				N	N	N
C12	ce root	y6	UNKNOWN	SYBR	None	0.0241359	0.0196606	0.0296298	29.0411	29.1107	0.16594		10.1502	0.106565			5.37268	TRUE	0.174187	TRUE	3	24	1	82.3457				N	N	N
D1	ce root	actin	UNKNOWN	SYBR	None				19.053	18.9605	0.0808215							TRUE	0.164752	TRUE	3	15	1	82.9234				N	N	N
D2	ce root	actin	UNKNOWN	SYBR	None				18.9248	18.9605	0.0808215							TRUE	0.164752	TRUE	3	14	1	82.9234				N	N	N
D3	ce root	actin	UNKNOWN	SYBR	None				18.9037	18.9605	0.0808215							TRUE	0.164752	TRUE	3	14	1	83.116				N	N	N
D4	ce root	y3	UNKNOWN	SYBR	None	0.00728714	0.0026346	0.0201558	28.8105	28.8211	0.912077		9.86054	0.528651			7.10043	TRUE	0.0942025	TRUE	3	25	1	74.8354				Y	N	N
D5	ce root	y3	UNKNOWN	SYBR	None	0.00728714	0.0026346	0.0201558	29.7384	28.8211	0.912077		9.86054	0.528651			7.10043	TRUE	0.0942025	TRUE	3	26	1	74.8354				Y	N	N
D6	ce root	y3	UNKNOWN	SYBR	None	0.00728714	0.0026346	0.0201558	27.9143	28.8211	0.912077		9.86054	0.528651			7.10043	TRUE	0.0942025	TRUE	3	24	1	74.8354				Y	N	N
D7	ce root	y5	UNKNOWN	SYBR	None	0.0330774	0.0204967	0.0533799	33.3036	32.8368	0.42308		13.8763	0.248682			4.91801	TRUE	0.109436	TRUE	3	29	1	85.4269				N	N	N
D8	ce root	y5	UNKNOWN	SYBR	None	0.0330774	0.0204967	0.0533799	32.4787	32.8368	0.42308		13.8763	0.248682			4.91801	TRUE	0.109436	TRUE	3	28	1	84.8491	74.2577			N	N	Y
D9	ce root	y5	UNKNOWN	SYBR	None	0.0330774	0.0204967	0.0533799	32.7281	32.8368	0.42308		13.8763	0.248682			4.91801	TRUE	0.109436	TRUE	3	28	1	85.2343	74.4503			N	N	Y
D10	ce root	y7	UNKNOWN	SYBR	None	0.537288	0.43894	0.657672	27.7563	27.5708	0.163021		8.61028	0.105053			0.896232	TRUE	0.1639	TRUE	3	23	1	85.4269				N	N	N
D11	ce root	y7	UNKNOWN	SYBR	None	0.537288	0.43894	0.657672	27.4502	27.5708	0.163021		8.61028	0.105053			0.896232	TRUE	0.1639	TRUE	3	23	1	85.2343				N	N	N
D12	ce root	y7	UNKNOWN	SYBR	None	0.537288	0.43894	0.657672	27.5059	27.5708	0.163021		8.61028	0.105053			0.896232	TRUE	0.1639	TRUE	3	23	1	85.2343				N	N	N
E1	ce root	DL	UNKNOWN	SYBR	None	0.0768216	0.056542	0.104375	30.2349	30.5394	0.263749		11.5789	0.159264			3.70234	TRUE	0.225598	TRUE	3	25	1	83.8863	78.1091			N	Y	Y
E2	ce root	DL	UNKNOWN	SYBR	None	0.0768216	0.056542	0.104375	30.695	30.5394	0.263749		11.5789	0.159264			3.70234	TRUE	0.225598	TRUE	3	25	1	84.0789	78.3017			N	N	Y
E3	ce root	DL	UNKNOWN	SYBR	None	0.0768216	0.056542	0.104375	30.6883	30.5394	0.263749		11.5789	0.159264			3.70234	TRUE	0.225598	TRUE	3	26	1	83.8863	78.1091			N	N	Y
Analysis Type	Singleplex
Endogenous Control	actin
RQ Min/Max Confidence Level	95.0
Reference Sample	pei

## Sheet: BioGroup Analysis Result
Block Type	96alum
Chemistry	SYBR_GREEN
Experiment File Name	D:\b512\waq\0820-2.eds
Experiment Run End Time	2020-08-21 00:43:42 上午 CST
Instrument Type	sds7500
Passive Reference	ROX
Biogroup Name	Target Name	Task	RQ	RQ Min	RQ Max	Cт Mean	ΔCт Mean	ΔCт SE	ΔΔCт
Analysis Type	Singleplex
Endogenous Control	actin
RQ Min/Max Confidence Level	95.0
Reference Biogroup Name
