# Supplementary material for: Comprehensive study of rice YABBY gene family: evolution, expression and interacting proteins analysis
Source: PeerJ journal article supplement (doi:10.7717/peerj.14783), 2023-02-24
Supplement: Supplementary_figure1.pdf [file Supplementary_figure1.pdf]

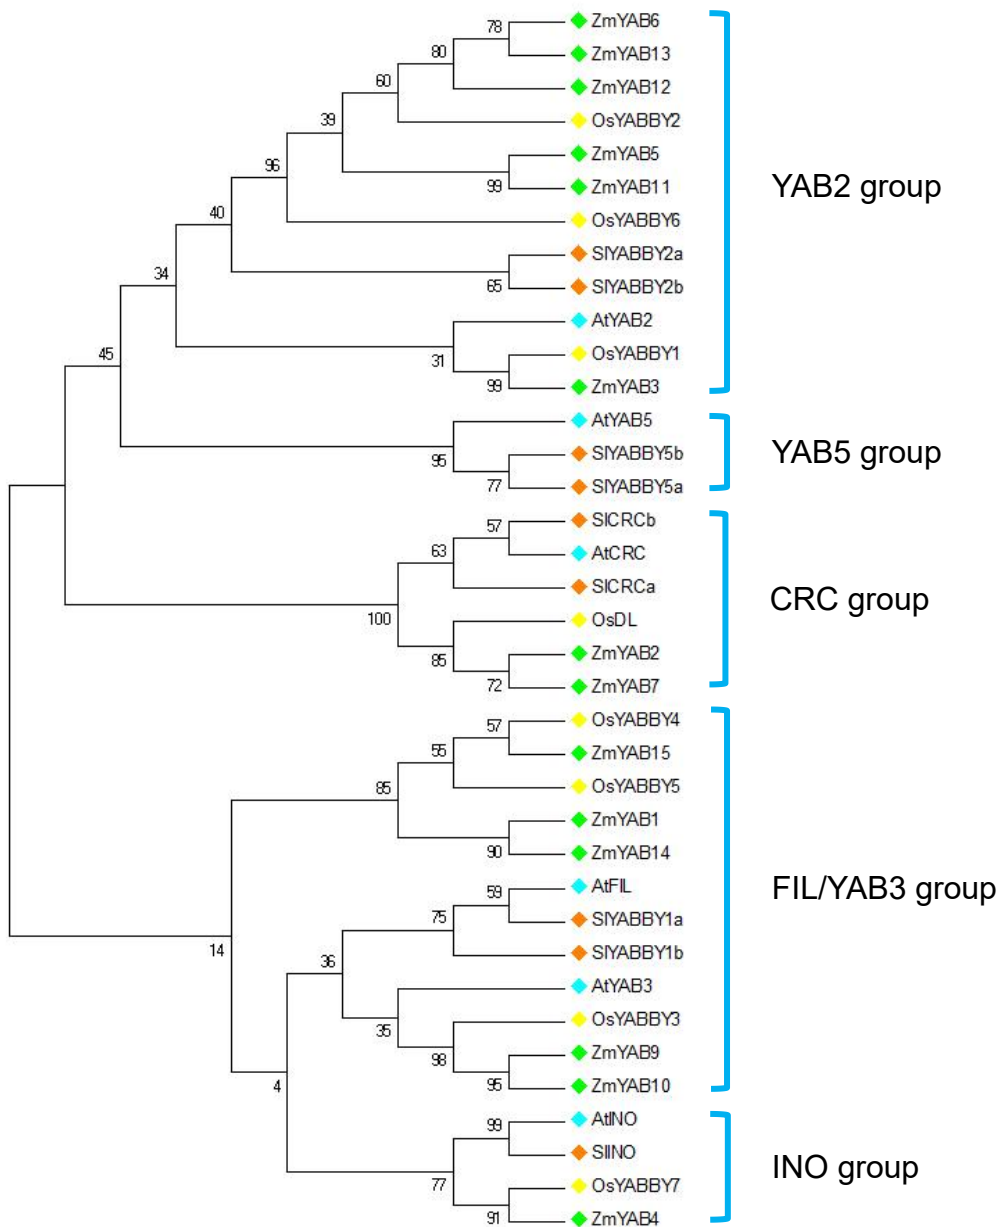

**Figure S1** Maximum-likelihood (ML) phylogenetic tree tree of YABBY proteins involving *Oryza sativa* (Os), *Arabidopsis thaliana* (At), *Solanum lycopersicum* (Sl) and *Zea mays* (Zm).
