# Supplementary material for: Comprehensive study of rice YABBY gene family: evolution, expression and interacting proteins analysis
Source: PeerJ journal article supplement (doi:10.7717/peerj.14783), 2023-02-24
Supplement: Supplementary_figure3.pdf [file Supplementary_figure3.pdf]

**A****C2C2 zinc finger domain**

```

* 60 * * * * * * * * * * 80 * * * * * * * * 100
OsYABBY1 BHVCYVNCNYCNTILV--VNVENNCSYNIIVTVRCGHCTMVLSDLAPF---
OsYABBY2 BHVCYVFCNFCNTIFA--VSVFSNSMLNIIVTVRCGHCTSLLSVNLRGLVQA
OsYABBY3 BCLCYVFCNFCNTIVL--VSVFSSSI FETVTVRCGHCSILLTVNMRGLLLP
OsYABBY4 BCLCYVFCNFCNTILA--VGVECCSIFKTVTVRCGHCANLLSVNLRGLLLP
OsYABBY5 BCLCYVFCNFCNTILA--VGVECCSIFKTVTVRCGHCANLLSVNLRGLLLP
OsYABBY6 BCVCYVFCNFCNTILA--VSVFGNSMLNIIVTVRCGHCTNLLSVNLRGLMHS
OsYABBY7 ERIGCVCCSFCATVIL--VSVFCSSVLRVVAVCCGHCSGLLSAVNLRPPS--
OsDL      BHLCYVRCNTVIALCVGVFCCKRIMDTVTVRCGHGN-NLSFLSPRP---
AtCRC     EHLIYVRCISICNTILA--VGIHLKRLDITVTVRCGHCG-NLSFLTTP---
E 6cyV C C T61 V 6P VtV CGHC L3

```

**B****YABBY domain**

```

220 * * * * * * * * * * 240 * * * * * * * * * * 260
OsYABBY1 RPPEKRQRVPSAYNRFIKKEEIQRIKTSNPEISHREAFSPAANKRRRRRRRRRQQL
OsYABBY2 RPPEKRQRVPSAYNRFIKKEEIRRIKANNPDI SHREAFSPAANKWAHFPNIHFGLG
OsYABBY3 RPPEKRQRVPSAYNRFIKDEIQRIKAGNPDISHREAFSPAANKWAHFPNIHFGLM
OsYABBY4 RPPEKRQRVPSAYNRFIKDEIQRIKAGNPDISHREAFSPAANKWAHFPNIHFGLM
OsYABBY5 RPSSEKRQRVPSAYNRFIKDEIQRIKASNPDI THREAFSPAANKWAHFPNIHFGLM
OsYABBY6 RPPEKRQRVPSAYNRFIKKEEIRRIKANNPDI SHREAFSPAANKWAHYPNIHFGLS
OsYABBY7 KPEGRKQRTPSAYNRCFVKKEEIKRIKSMENI THKQAFSPAANKWAHLPRIQQKRG
OsDL      -PPEKKERLPSAYNRFMRDEIQRIKAAKPDIEHREAFSPAANKWAKCDPRCSSTV
AtCRC     -PPEKKQRTPSAYNRFMRDEIQRIKSANPEIEHREAFSPAANKWAKYIPNSPTSI
ppe44qR PSAYNRF64 EI RIK nP I H42AFS AAKNwa

```

**Figure S3** Sequence alignment of Zinc finger domain (A) and YABBY domain (B) between OsYABBYs and AtCRC. Asterisks indicate important amino acid positions in the domain, black and red asterisks showed unchanged and changed amino acid sites, respectively.
