# Supplementary material for: Comprehensive study of rice YABBY gene family: evolution, expression and interacting proteins analysis
Source: PeerJ journal article supplement (doi:10.7717/peerj.14783), 2023-02-24
Supplement: Supplementary_figure4.pdf [file Supplementary_figure4.pdf]

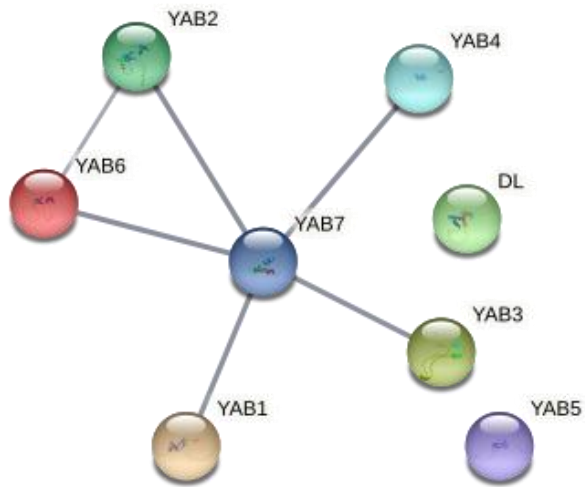

**Figure S4** STRING predicted interaction network between OsYABBYs.
