# Supplementary material for: Comprehensive study of rice YABBY gene family: evolution, expression and interacting proteins analysis
Source: PeerJ journal article supplement (doi:10.7717/peerj.14783), 2023-02-24
Supplement: Supplementary_figure5.pdf [file Supplementary_figure5.pdf]

**A**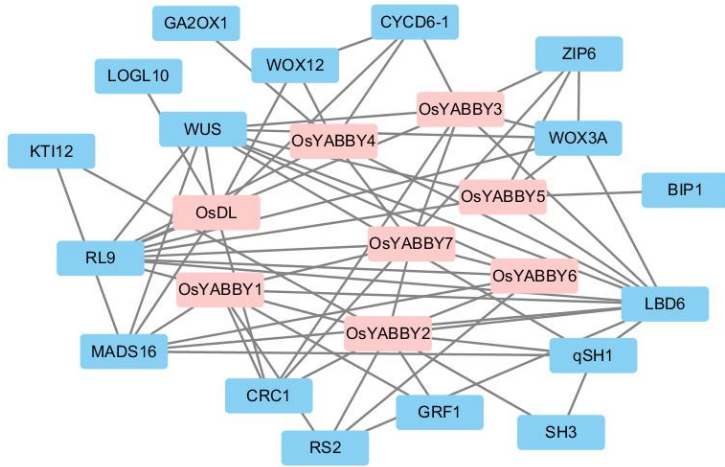**B**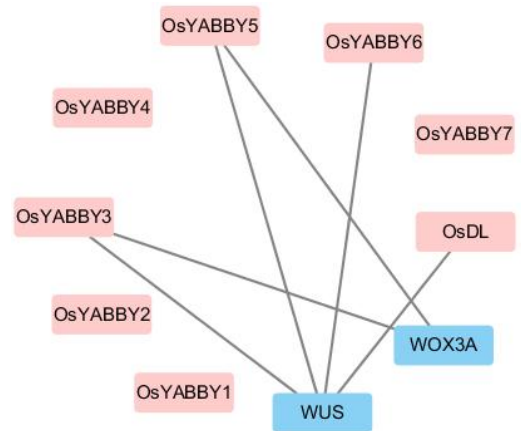

**Figure S5** Interaction between OsYABBYs and other proteins. (A) PPI network predicted by the STRING website. (B) The interaction between OsYABBY and WUSCHEL-LIKE HOMEBOX 1 (WUS) and WUSCHEL-related homeobox 3A (WOX3A). The pink and blue nodes represented OsYABBY proteins and their interacting proteins, respectively.
